# Supplementary material
Source: publisher site journal article supplement (https://www.dovepress.com/article/567428)
Supplement: Supplementary file 1 [file 567428%20Supplementary%20Material.docx]

|  | **STUDY PERIOD** | | | | |
| --- | --- | --- | --- | --- | --- |
| **Enrolment** | **Baseline** | **Pre-pain threshold test** | **Pain threshold test** | **Post-test** |
| **TIMEPOINT** | **Sleep-related data collection** |
| **ENROLMENT:**  Eligibility screen  Informed consent  General information |  |  |  |  |  |
| 🞩 |  |  |  |  |
| 🞩 |  |  |  |  |
|  | 🞩 |  |  |  |
| **ASSESSMENTS:**  Pittsburgh Sleep Quality Index (PSQI)  Self-Rating Anxiety Scale (SAS)  Self-Rating Depression Scale (SDS)  Polysomnography (PSG)*  Heart rate variability (HRV)* |  |  |  |  |  |
|  |  | 🞩 |  |  |
|  |  | 🞩 |  |  |
|  |  | 🞩 |  |  |
|  |  | 🞩 |  |  |
|  |  | 🞩 |  |  |
| **Pain threshold test** |  |  |  | 🞩 |  |
| **Adverse events** |  |  |  | ⬥ | ⬥ |
| **Reasons for drop-out and withdrawals** | ⬥ |  |  |  | ⬥ |

**Supplementary Table 1: Schedule of enrolment, pain threshold test, and assessments.**

Note: *: In the patient group, PSG and HRV will be implemented as far as practical.

🞩 indicates Conducting a process or collecting an indicator; ⬥ ⬥indicates ongoing processes.

**
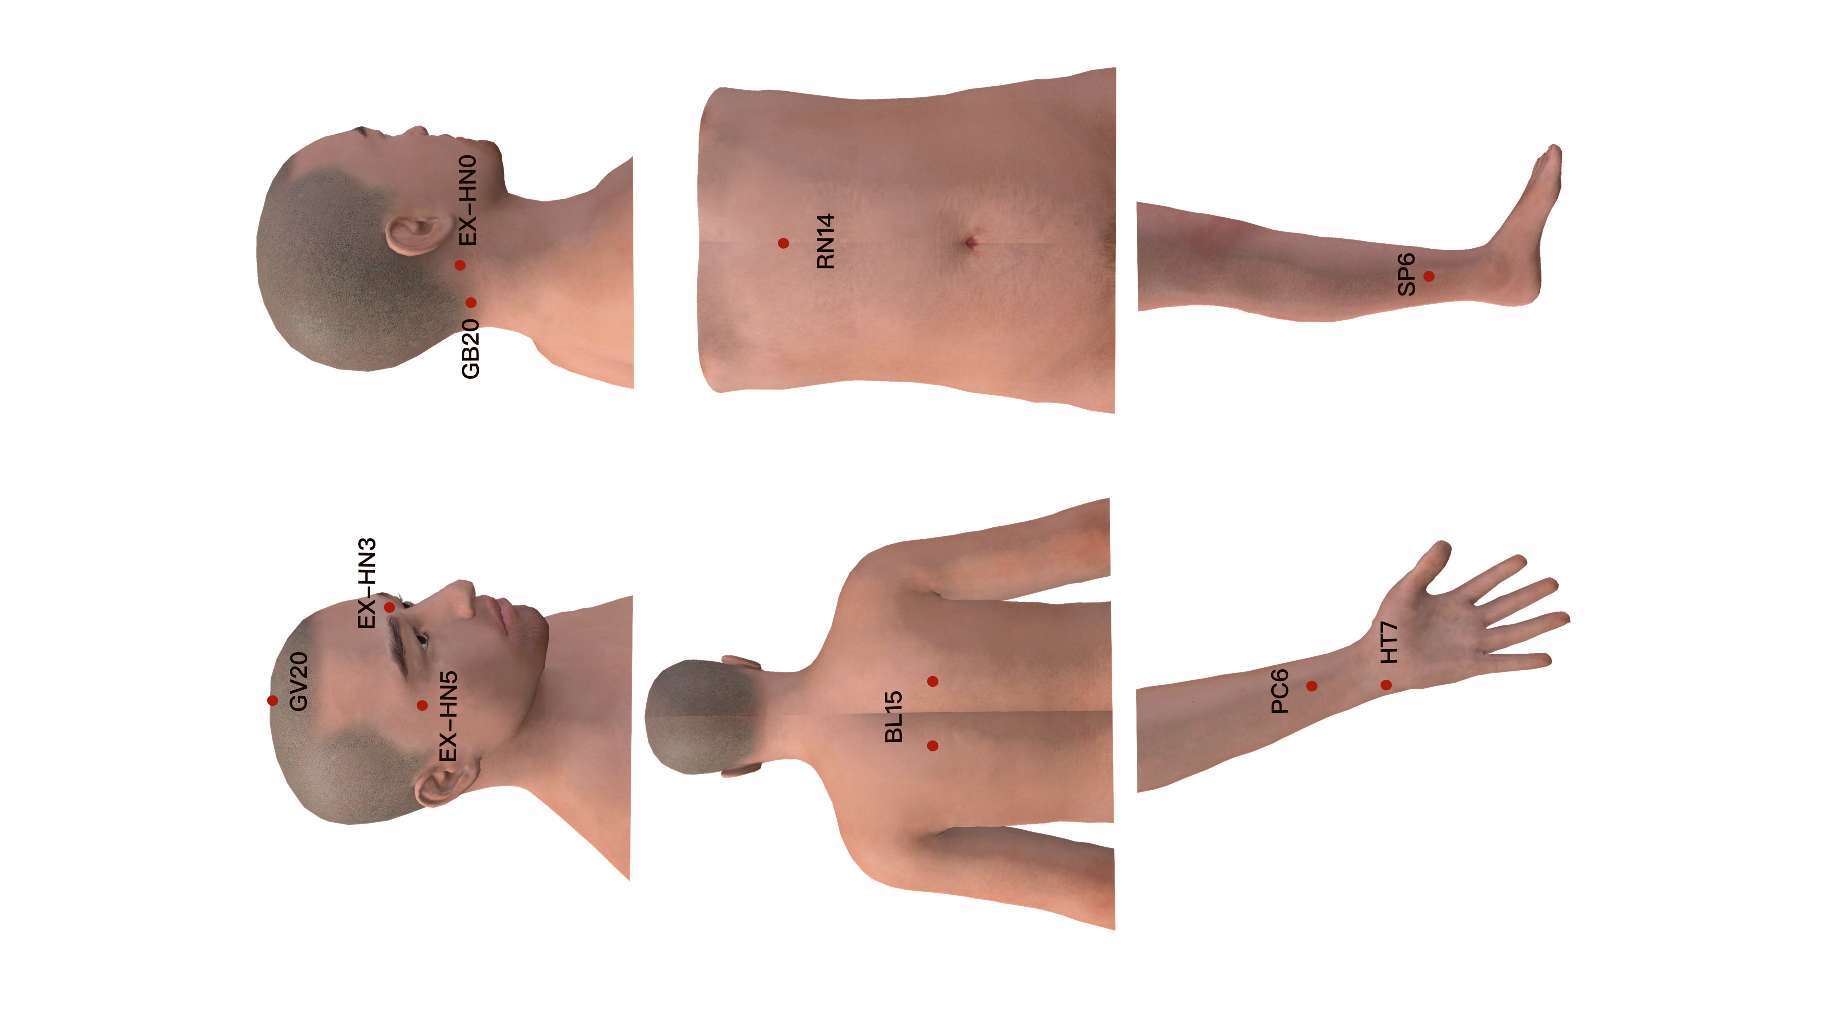
**

**Supplementary Figure 1: The test acupoints that will be used in the study.**


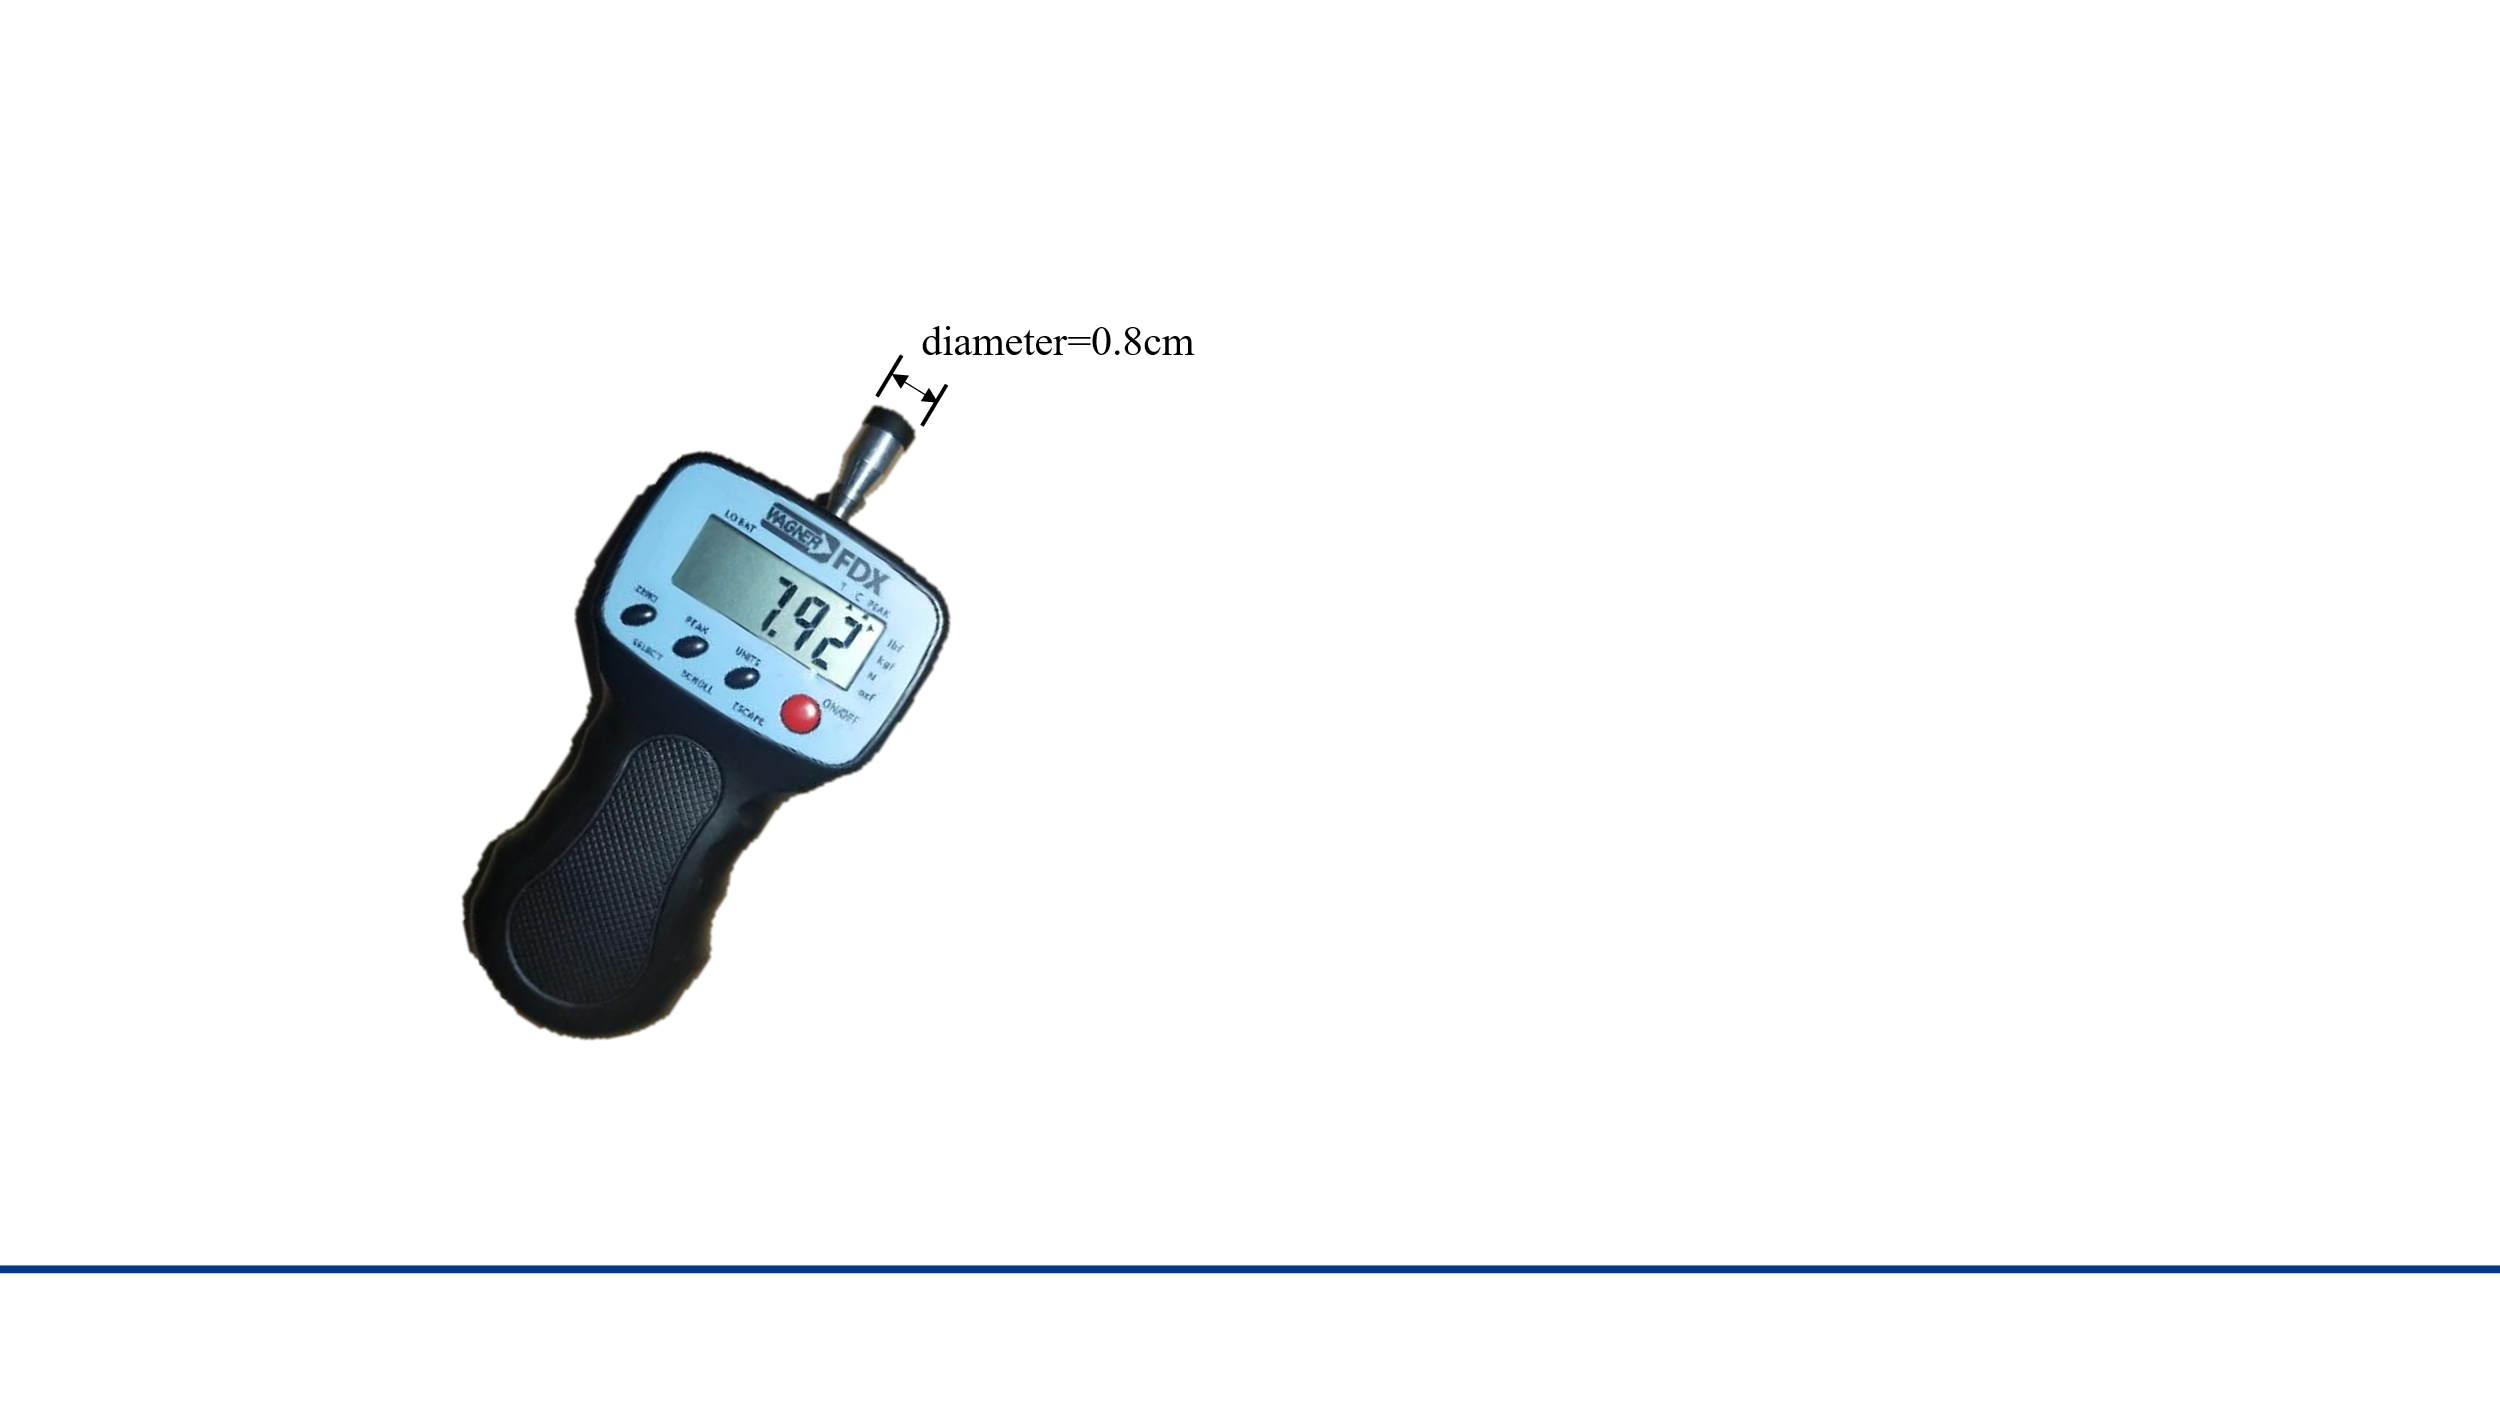

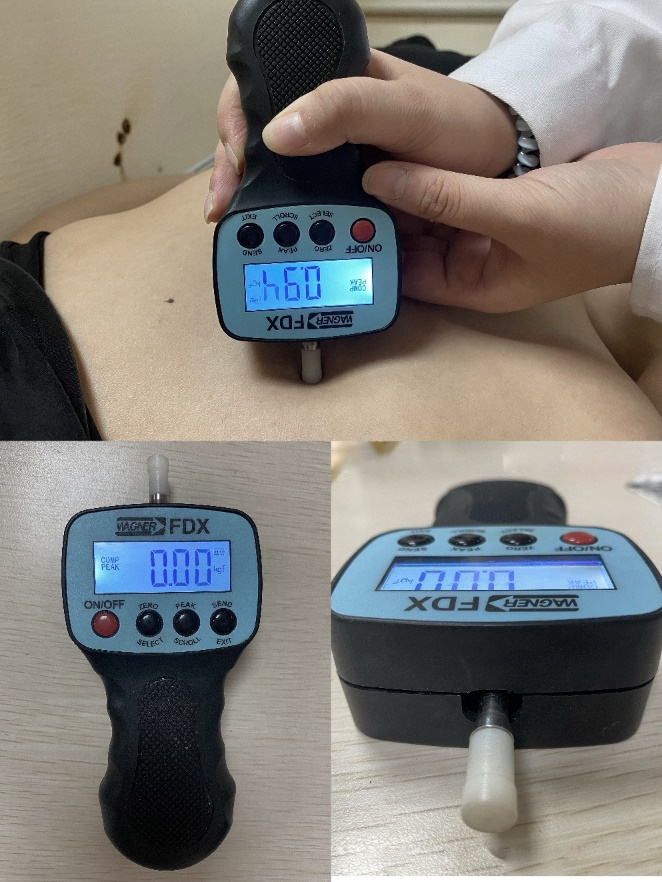


**Supplementary Figure 2: Force One FDIX and PPT measurement illustration.**


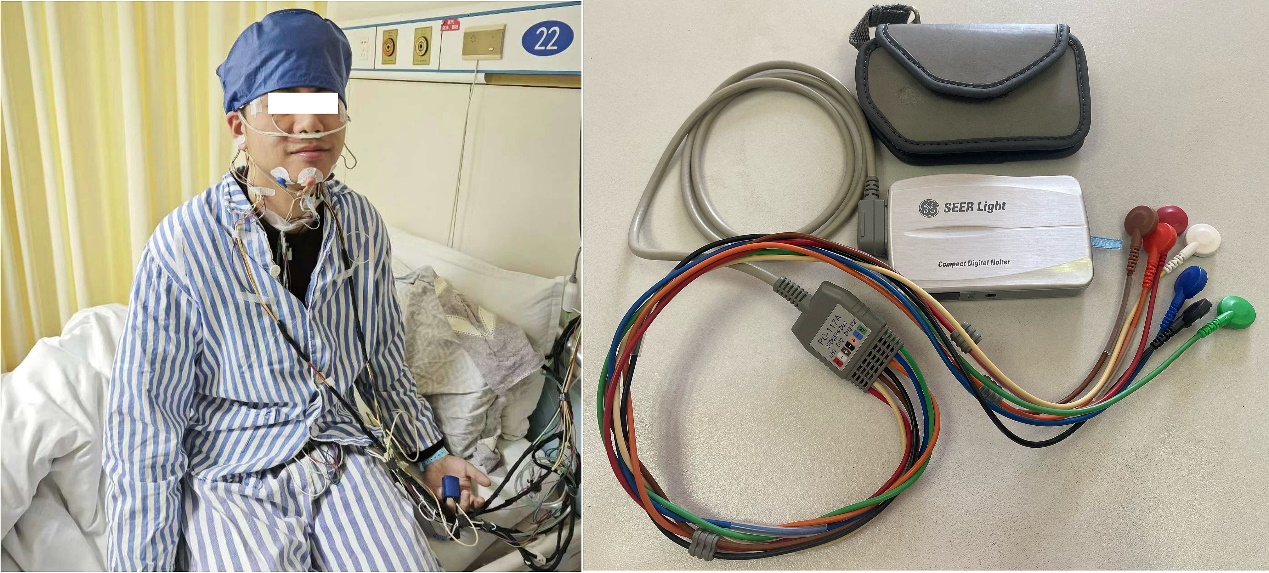


**Supplementary Figure 3: PSG and HRV device.**

| Supplementary Table 2: Acupoints selected for use in the study | |
| --- | --- |
| Acupoints | **Location** |
| *Baihui* (GV20) | On the head, 5 cun straight up from the center of the front hairline |
| *Yintang* (EX-HN3) | On the head, in the depression midway between the medial ends of the two eyebrows |
| *Taiyang* (EX-HN5) | On the head, between the tip of the eyebrow and the outer canthus of the eye, in the depression about one horizontal finger backward |
| *Anmian* (EX-HN0) | On the neck, at the midpoint of the line connecting Yifeng and Fengchi. Yifeng is in the depression behind the ear; Fengchi is below the occipital bone, in the depression between the upper end of the sternocleidomastoid muscle and the upper end of the trapezius muscle. |
| *Fengchi* (GB20) | On the neck, below the occipital bone, in the depression between the upper end of the sternocleidomastoid muscle and the upper end of the trapezius muscle |
| *Shenmen* (HT7) | In the anteromedial aspect of the anterior wrist, at the ulnar end of the distal transverse line of the palmar side of the wrist, at the radial edge of the ulnar wrist flexor tendon |
| *Neiguan* (PC6) | On the anterior side of the forearm, 2 cun above the transverse stripe on the distal part of the palmar side of the wrist, between the tendon of the palmaris longus and the tendon of the flexor carpi radialis muscle |
| *Sanyinjiao* (SP6) | On the medial side of the lower leg, 3 cun above the tip of the inner ankle, posterior to the medial border of the tibia bone. |
| *Juque* (RN14) | In the upper abdomen, 6 cun above the umbilicus, on the anterior midline |
| *Xinshu* (BL15) | On the back, below the spinous process of the 5th thoracic vertebra, 1.5 cun from the posterior midline. |

| **Supplementary Table 3: PSG and HRV operation procedures** | |
| --- | --- |
| **PSG operation procedures** | |
| 1 | Subjects were prepared, washed, and wired. |
| 2 | Localization and interpretation followed the AASM Manual for the Interpretation of Sleep and Related Events, version 2.6. Brain regions were identified using the International 10-20 system, and leads (e.g., electrooculogram, mandibular electromyogram) were established according to the manual for preselection and localization. |
| 3 | Cleanse the skin with an abrasive cream that. |
| 4 | The wires are fixed with conductive paste and the head is fixed with an elastic mesh cap. |
| 5 | The cardiac leads were connected with splinter electrodes and chest and abdominal tethers. |
| 6 | Nasal catheters, snore detectors and oxygen clamps were placed. |
| 7 | The operator opens the SleepwareG3 software, enters the subject's personal information, calibrates it, and begins data logging. |
| **HRV operation procedures** | |
| 1 | Subjects were asked to refrain from strenuous activity for 1 hour prior to the test and to refrain from consuming alcohol, caffeine, or strong tea for 24 hours. |
| 2 | After resting on your back for 10 minutes, wash the skin area with alcohol and gently rub to minimize impedance. |
| 3 | A standard 12-lead electrode was used, secured with tape and an elastic bandage, and the device activated. The recordings were then analyzed and |

| **Supplementary Table 4:** **The relationship between types of insomnia and acupoint pressure pain thresholds (Mean± SD, gf)** | | | | | | | | |
| --- | --- | --- | --- | --- | --- | --- | --- | --- |
|  | **Difficulty falling asleep** | **Difficulty staying asleep** | **Early riser** | |  | **Hybrid type** | ***F*** | ***p* Value** |
| GV20 | 1162.74±282.61 | 1271.25±310.64 | 1176.33±284.52 | 1266.58±233.26 | | | 0.776 | 0.512 |
| EX-HN3 | 1210.16±390.72 | 1198.13±177.32 | 1210.00±342.37 | 1372.89±333.51 | | | 1.039 | 0.381 |
| EX-HN5 | 1222.98±252.60 | 1340.31±256.86 | 1225.33±435.38 | 1287.76±286.78 | | | 0.537 | 0.662 |
| EX-HN0 | 1260.32±255.52 | 1341.25±171.17 | 1292.67±281.98 | 1290.26±173.43 | | | 0.274 | 0.844 |
| GB20 | 1370.57±258.99 | 1481.88±149.40 | 1296.83±277.52 | 1433.03±256.01 | | | 1.257 | 0.296 |
| HT7 | 1334.76±260.40 | 1335.31±180.51 | 1361.17±273.45 | 1460.00±188.72 | | | 1.180 | 0.324 |
| PC6 | 1346.21±257.73 | 1345.63±137.62 | 1372.50±378.59 | 1443.29±209.09 | | | 0.566 | 0.639 |
| SP6 | 1339.27±247.10 | 1492.19±175.05 | 1415.50±223.41 | 1428.55±198.08 | | | 1.330 | 0.272 |
| RN14 | 1795.89±380.07 | 1896.25±110.93 | 1815.67±335.54 | 1804.74±292.18 | | | 0.201 | 0.895 |
| BL15 | 1278.55±284.73 | 1486.25±237.96 | 1294.33±275.19 | 1415.79±225.39 | | | 1.947 | 0.130 |

| **Supplementary Table 5: The relationship between types of insomnia and acupoint pain sensitization rate (n(%))** | | | | | | | |
| --- | --- | --- | --- | --- | --- | --- | --- |
|  | **Difficulty falling asleep** | **Difficulty staying asleep** | **Early riser** |  | **Hybrid type** | **χ2** | ***p* Value** |
| GV20 | 20(64.5%) | 5(62.5%) | 12(80.0%) | | 10(52.6%) | 2.752 | 0.431 |
| EX-HN3 | 17(54.8%) | 5(62.5%) | 7(46.7%) | | 6(31.6%) | 3.380 | 0.337 |
| EX-HN5 | 17(54.8%) | 4(50.0%) | 8(53.3%) | | 8(42.1%) | 0.819 | 0.845 |
| EX-HN0 | 24(77.4%) | 6(75.0%) | 10(66.7%) | | 14(73.7%) | 0.597 | 0.897 |
| GB20 | 27(87.1%) | 7(87.5%) | 13(86.7%) | | 14(73.7%) | 1.692 | 0.639 |
| HT7 | 25(80.6%) | 6(75.0%) | 11(73.3%) | | 9(47.4%) | 6.211 | 0.102 |
| PC6 | 20(64.5%) | 6(75.0%) | 8(53.3%) | | 9(47.4%) | 2.536 | 0.469 |
| SP6 | 27(87.1%) | 6(75.0%) | 12(80.0%) | | 16(84.2%) | 0.817 | 0.845 |
| RN14 | 26(83.9%) | 8(100.0%) | 12(80.0%) | | 15(78.9%) | 3.282 | 0.350 |
| BL15 | 30(96.8%) | 17(87.5%) | 14(93.3%) | | 16(84.2%) | 2.691 | 0.442 |

| **Supplementary Table 6: The relationship between disease duration and acupoint pressure pain thresholds (Mean±SD, gf)** | | | | | | |
| --- | --- | --- | --- | --- | --- | --- |
|  | **3-6 months** | **6-12 months** | **12-36 months** | **>36 mouths** | ***F*** | ***p* Value** |
| GV20 | 1192.73±304.17 | 1094.44±176.15 | 1224.44±279.69 | 1226.73±284.08 | 0.590 | 0.623 |
| EX-HN3 | 1013.64±301.87 | 1248.89±200.59 | 1232.59±354.40 | 1371.73±364.31 | 2.966 | 0.038* |
| EX-HN5 | 965.68±344.72 | 1240.56±217.54 | 1293.98±286.96 | 1336.83±267.44 | 4.760 | 0.004* |
| EX-HN0 | 1131.36±230.51 | 1384.44±286.37 | 1276.85±198.42 | 1320.19±225.42 | 2.527 | 0.065 |
| GB20 | 1163.18±242.52 | 1422.22±258.84 | 1408.70±248.40 | 1438.17±227.82 | 3.669 | 0.016* |
| HT7 | 1250.46±233.30 | 1358.33±205.15 | 1390.28±254.70 | 1411.54±234.21 | 1.248 | 0.299 |
| PC6 | 1172.50±348.03 | 1428.33±214.69 | 1422.22±240.18 | 1398.27±237.44 | 2.822 | 0.045* |
| SP6 | 1249.55±294.98 | 1482.78±130.17 | 1456.57±192.66 | 1362.02±223.37 | 3.093 | 0.033* |
| RN14 | 1631.14±413.38 | 1816.11±364.64 | 1828.89±237.78 | 1873.08±340.09 | 1.498 | 0.223 |
| BL15 | 1200.45±355.74 | 1441.11±221.67 | 1410.56±273.82 | 1291.54±235.10 | 2.312 | 0.084 |

Note: * indicates P<0.05; the difference is statistically significant.

| **Supplementary Table 7: The relationship between disease** **duration and** **acupoint pain sensitization rate (n(%))** | | | | | | |
| --- | --- | --- | --- | --- | --- | --- |
|  | **3-6 months** | **6-12 months** | **12-36 months** | **>36 mouths** | **χ2** | ***p* Value** |
| GV20 | 7(63.6%) | 7(77.8%) | 18(66.7%) | 15(57.7%) | 1.319 | 0.725 |
| EX-HN3 | 8(72.7%) | 3(33.3%) | 15(55.6%) | 9(34.6%) | 6.090 | 0.107 |
| EX-HN5 | 9(81.8%) | 4(44.4%) | 12(44.4%) | 12(46.2%) | 5.404 | 0.145 |
| EX-HN0 | 10(90.9%) | 7(77.8%) | 21(77.8%) | 16(61.5%) | 4.221 | 0.239 |
| GB20 | 11(100.0%) | 7(77.8%) | 21(77.8%) | 22(84.6%) | 4.779 | 0.189 |
| HT7 | 11(100.0%) | 7(77.8%) | 18(66.7%) | 15(57.7%) | 10.023 | 0.018* |
| PC6 | 10(90.9%) | 4(44.4%) | 15(55.6%) | 14(53.8%) | 6.819 | 0.078 |
| SP6 | 11(100.0%) | 7(77.8%) | 21(77.8%) | 22(84.6%) | 4.779 | 0.189 |
| RN14 | 10(90.9%) | 7(77.8%) | 24(88.9%) | 20(76.9%) | 2.078 | 0.556 |
| BL15 | 10(90.9%) | 9(100.0%) | 23(85.2%) | 25(96.2%) | 3.646 | 0.302 |

Note: * indicates P<0.05; the difference is statistically significant.

| **Supplementary Table 8: Relationship between frequency of attacks and acupoint pressure pain thresholds (Mean±SD, gf)** | | | | | |
| --- | --- | --- | --- | --- | --- |
|  | **3 times a week** | **4-5 times a week** | **＞5 times a week** | ***F*** | ***p* Value** |
| GV20 | 1226.67±368.39 | 1254.79±254.85 | 1159.12±235.31 | 0.926 | 0.401 |
| EX-HN3 | 1284.67±323.55 | 1214.38±398.15 | 1262.35±333.01 | 0.214 | 0.808 |
| EX-HN5 | 1182.83±265.69 | 1266.77±332.69 | 1274.63±301.77 | 0.505 | 0.606 |
| EX-HN0 | 1349.00±339.75 | 1269.38±230.71 | 1264.85±169.01 | 0.749 | 0.477 |
| GB20 | 1373.00±298.47 | 1343.02±287.44 | 1417.50±208.93 | 0.612 | 0.545 |
| HT7 | 1401.00±222.04 | 1397.50±175.29 | 1343.02±285.99 | 0.485 | 0.618 |
| PC6 | 1344.50±249.35 | 1423.85±212.35 | 1357.87±304.08 | 0.572 | 0.567 |
| SP6 | 1414.33±232.36 | 1423.33±187.15 | 1366.32±248.42 | 0.514 | 0.600 |
| RN14 | 1651.50±361.35 | 1772.29±312.93 | 1913.53±288.35 | 3.973 | 0.023* |
| BL15 | 1397.00±308.81 | 1305.63±272.17 | 1339.71±268.30 | 0.498 | 0.610 |

Note: * indicates P<0.05; the difference is statistically significant.

| **Supplementary Table 9: Relationship between the frequency of attacks and acupoint pain sensitization rate (n(%))** | | | | | |
| --- | --- | --- | --- | --- | --- |
|  | **3 times a week** | **4-5 times a week** | **＞5 times a week** | **χ2** | ***P*** |
| GV20 | 11(73.3%) | 12(50.0%) | 24(70.6%) | 3.260 | 0.196 |
| EX-HN3 | 7(46.7%) | 11(45.8%) | 17(50.0%) | 0.110 | 0.946 |
| EX-HN5 | 9(60.0%) | 11(45.8%) | 17(50.0%) | 0.757 | 0.685 |
| EX-HN0 | 10(66.7%) | 16(66.7%) | 28(82.4%) | 2.321 | 0.313 |
| GB20 | 12(80.0%) | 19(79.2%) | 30(88.2%) | 1.037 | 0.595 |
| HT7 | 11(73.3%) | 16(66.7%) | 24(70.6%) | 0.211 | 0.900 |
| PC6 | 10(66.7%) | 12(50.0%) | 21(61.8%) | 1.272 | 0.529 |
| SP6 | 13(86.7%) | 19(79.2%) | 29(85.3%) | 0.504 | 0.777 |
| RN14 | 13(86.7%) | 20(83.3%) | 28(82.4%) | 0.148 | 0.929 |
| BL15 | 14(93.3%) | 22(91.7%) | 31(91.2%) | 0.067 | 0.967 |

| **Supplementary Table** **10: Correlation of acupoint pressure pain thresholds with sleep continuity parameters** | | | | | | | |
| --- | --- | --- | --- | --- | --- | --- | --- |
|  | **Sleep latency (s)** | | **Sleep efficiency (%)** | | **Wake-up time after sleep (times)** | | |
| ***r*** | ***P*** | ***r*** | ***P*** | | ***r*** | ***P*** |
| GV20 | -0.233 | 0.274 | 0.111 | 0.642 | | 0.012 | 0.957 |
| EX-HN3 | -0.468 | 0.021* | 0.330 | 0.156 | | 0.013 | 0.951 |
| EX-HN5 | -0.129 | 0.547 | 0.104 | 0.664 | | 0.154 | 0.473 |
| EX-HN0 | 0.198 | 0.353 | -0.170 | 0.474 | | 0.108 | 0.616 |
| GB20 | -0.221 | 0.298 | 0.047 | 0.845 | | 0.022 | 0.918 |
| HT7 | 0.061 | 0.776 | -0.209 | 0.376 | | 0.214 | 0.315 |
| PC6 | 0.001 | 0.995 | -0.214 | 0.364 | | 0.333 | 0.112 |
| SP6 | -0.140 | 0.515 | -0.099 | 0.679 | | 0.032 | 0.881 |
| RN14 | -0.157 | 0.463 | 0.076 | 0.749 | | -0.038 | 0.860 |
| BL15 | -0.249 | 0.241 | -0.110 | 0.644 | | -0.074 | 0.732 |

Note: * indicates P<0.05; the difference is statistically significant.

| **Supplementary Table 11: Single-factor logistic regression of acupoint sensitivity and sleep continuity parameters** | | | | | | | | | | | | | | | | | | |
| --- | --- | --- | --- | --- | --- | --- | --- | --- | --- | --- | --- | --- | --- | --- | --- | --- | --- | --- |
|  | **Sleep latency (s)** | | | | | | **Sleep efficiency (%)** | | | | | | **Wake-up time after sleep (times)** | | | | | |
| B | SE | Wald | *P* | *OR* | 95%CI  (lower bound- upper bound) | B | SE | Wald | *P* | *OR* | 95%CI  (lower bound- upper bound) | B | SE | Wald | *P* | *OR* | 95%CI  (lower bound- upper bound) |
| GV20 | 0.010 | 0.018 | 0.332 | 0.571 | 1.010 | (0.975 -1.047) | -0.002 | 0.019 | 0.014 | 0.906 | 0.998 | (0.961 -1.035) | -0.007 | 0.008 | 0.897 | 0.344 | 0.993 | (0.977 -1.008) |
| EX-HN3 | 0.073 | 0.034 | 4.472 | 0.054 | 1.075 | (1.005 -1.150) | 0.005 | 0.019 | 0.059 | 0.808 | 1.005 | (0.968 -1.043) | 0.007 | 0.006 | 1.087 | 0.297 | 1.007 | (0.994 -1.020) |
| EX-HN5 | 0.007 | 0.018 | 0.168 | 0.682 | 1.007 | (0.973 -1.043) | -1.827 | 3.255 | 0.315 | 0.575 | 0.161 | (0.000 -9.489) | 0.005 | 0.006 | 0.818 | 0.366 | 1.005 | (0.994 -1.017) |
| EX-HN0 | -0.001 | 0.021 | 0.004 | 0.952 | 0.999 | (0.958 -1.042) | 0.407 | 3.580 | 0.013 | 0.909 | 1.503 | (0.001 -1.673) | 0.003 | 0.007 | 0.129 | 0.719 | 1.003 | (0.988 -1.018) |
| GB20 | 0.028 | 0.032 | 0.776 | 0.378 | 1.029 | (0.966 -1.096) | 0.072 | 0.271 | 0.071 | 0.791 | 1.075 | (0.632 -1.828) | 0.003 | 0.008 | 0.139 | 0.710 | 1.003 | (0.988 -1.018) |
| HT7 | 0.009 | 0.020 | 0.217 | 0.642 | 1.009 | (0.970 -1.050) | -0.012 | 0.019 | 0.401 | 0.526 | 0.988 | (0.952 -1.026) | 0.004 | 0.007 | 0.369 | 0.544 | 1.004 | (0.990 -1.018) |
| PC6 | 0.022 | 0.021 | 1.121 | 0.290 | 1.022 | (0.982 -1.064) | 2.122 | 3.398 | 0.390 | 0.523 | 8.345 | (0.011 -6.508) | -0.005 | 0.006 | 0.675 | 0.411 | 0.995 | (0.984 -1.007) |
| SP6 | 0.017 | 0.023 | 0.538 | 0.463 | 1.017 | (0.972 -1.065) | 1.778 | 3.201 | 0.309 | 0.579 | 5.921 | (0.011 -3.142) | -0.005 | 0.005 | 0.962 | 0.327 | 0.995 | (0.985 -1.005) |
| RN14 | 0.011 | 0.038 | 0.081 | 0.776 | 1.011 | (0.939 -1.088) | 0.070 | 0.429 | 0.027 | 0.871 | 1.072 | (0.463 -2.486) | 0.003 | 0.011 | 0.048 | 0.826 | 1.003 | (0.980 -1.025) |
| BL15 | 0.435 | 0.452 | 0.927 | 0.336 | 1.545 | (0.637 -3.747) | 0.057 | 0.263 | 0.047 | 0.828 | 1.059 | (0.632 -1.772) | 0.019 | 0.027 | 0.471 | 0.492 | 1.019 | (0.966 -1.074) |

Note: B indicates regression coefficient, SE indicates standard error, Wald indicates statistical value. *OR* indicates odds ratios, 95%CI indicates 95% confidence intervals.

| **Supplementary Table 12: Correlation between acupoint pressure pain thresholds and sleep depth parameters** | | | | |
| --- | --- | --- | --- | --- |
|  | **N3 duration (s)** | | **N3** **percentage (%)** | |
| ***r*** | ***P*** | ***r*** | ***P*** |
| GV20 | 0.357 | 0.086 | 0.448 | 0.047* |
| EX-HN3 | 0.249 | 0.240 | 0.104 | 0.663 |
| EX-HN5 | -0.031 | 0.887 | -0.208 | 0.378 |
| EX-HN0 | -0.085 | 0.692 | -0.209 | 0.376 |
| GB20 | -0.063 | 0.770 | -0.080 | 0.738 |
| HT7 | 0.068 | 0.753 | -0.027 | 0.910 |
| PC6 | -0.026 | 0.905 | 0.041 | 0.862 |
| SP6 | -0.139 | 0.517 | -0.044 | 0.853 |
| RN14 | 0.095 | 0.660 | 0.021 | 0.931 |
| BL15 | -0.032 | 0.883 | -0.107 | 0.653 |

Note: * indicates P<0.05; the difference is statistically significant.

| **Supplementary 13:** **Single-factor logistic regression of acupoint sensitivity and sleep depth parameters** | | | | | | | | | | | | |
| --- | --- | --- | --- | --- | --- | --- | --- | --- | --- | --- | --- | --- |
|  | **N3 duration(s)** | | | | | | **N3 percentage (%)** | | | | | |
| B | SE | Wald | *P* | *OR* | 95%CI  (lower bound- upper bound) | B | SE | Wald | *P* | *OR* | 95%CI  (lower bound- upper bound) |
| GV20 | -0.035 | 0.018 | 3.765 | 0.052 | 0.966 | (0.933 -1.000) | 0.373 | 0.556 | 0.451 | 0.502 | 1.452 | (0.489 -4.316) |
| EX-HN3 | -0.021 | 0.015 | 1.850 | 0.175 | 0.980 | (0.951 -1.009) | 0.677 | 1.244 | 0.296 | 0.586 | 1.969 | (0.172 -2.253) |
| EX-HN5 | 0.002 | 0.014 | 0.025 | 0.874 | 1.002 | (0.975 -1.030) | -0.469 | 0.899 | 0.271 | 0.602 | 0.626 | (0.107 -3.648) |
| EX-HN0 | -0.009 | 0.018 | 0.273 | 0.601 | 0.991 | (0.957 -1.026) | 0.591 | 2.199 | 0.072 | 0.788 | 1.806 | (0.024 -1.345) |
| GB20 | -0.024 | 0.021 | 1.319 | 0.251 | 0.977 | (0.938 -1.017) | 0.390 | 1.100 | 0.126 | 0.723 | 1.477 | (0.171 -1.275) |
| HT7 | -0.005 | 0.015 | 0.129 | 0.720 | 0.995 | (0.966 -1.024) | 0.737 | 2.563 | 0.083 | 0.774 | 2.089 | (0.014 -3.175) |
| PC6 | -0.007 | 0.014 | 0.233 | 0.629 | 0.993 | (0.966 -1.021) | 0.470 | 0.833 | 0.318 | 0.573 | 1.599 | (0.313 -8.185) |
| SP6 | -0.011 | 0.016 | 0.479 | 0.489 | 0.989 | (0.958 -1.021) | 0.343 | 0.754 | 0.207 | 0.649 | 1.410 | (0.322 -6.179) |
| RN14 | -0.032 | 0.034 | 0.876 | 0.349 | 0.968 | (0.906 -1.036) | 0.457 | 2.340 | 0.038 | 0.845 | 1.579 | (0.016 -1.548) |
| BL15 | -0.034 | 0.035 | 0.936 | 0.333 | 0.967 | (0.903 -1.035) | 0.406 | 1.960 | 0.043 | 0.836 | 1.501 | (0.032 -6.921) |

Note: B indicates regression coefficient, SE indicates standard error, Wald indicates statistical value. *OR* indicates odds ratios, 95%CI indicates 95% confidence intervals.

| **Supplementary Table 14: Correlation between REM parameters and acupoint pressure pain thresholds** | | | | |
| --- | --- | --- | --- | --- |
|  | **REM latency period (s)** | | **REM percentage (%)** | |
| ***r*** | ***P*** | ***r*** | ***P*** |
| GV20 | 0.131 | 0.542 | 0.035 | 0.885 |
| EX-HN3 | -0.244 | 0.250 | -0.090 | 0.707 |
| EX-HN5 | -0.212 | 0.320 | 0.015 | 0.948 |
| EX-HN0 | -0.046 | 0.831 | 0.015 | 0.950 |
| GB20 | 0.030 | 0.891 | 0.119 | 0.618 |
| HT7 | -0.163 | 0.448 | -0.053 | 0.823 |
| PC6 | -0.068 | 0.753 | 0.093 | 0.698 |
| SP6 | -0.173 | 0.419 | -0.106 | 0.656 |
| RN14 | 0.221 | 0.298 | -0.147 | 0.536 |
| BL15 | -0.093 | 0.665 | 0.354 | 0.125 |

Note: abbreviation: REM indicates Rapid Eye Movement.

| **Supplementary Table 15: Single-factor logistic regression analysis of acupoint sensitivity and REM parameters** | | | | | | | | | | | | |
| --- | --- | --- | --- | --- | --- | --- | --- | --- | --- | --- | --- | --- |
|  | **REM latency period (s)** | | | | | | **REM percentage (%)** | | | | | |
| B | SE | Wald | *P* | *OR* | 95%CI  (lower bound- upper bound) | B | SE | Wald | *P* | *OR* | 95%CI  (lower bound-  upper bound) |
| GV20 | -0.002 | 0.004 | 0.366 | 0.545 | 0.998 | (0.990 -1.005) | 2.322 | 7.037 | 0.109 | 0.741 | 1.193 | (0.001 -9.949) |
| EX-HN3 | 0.008 | 0.005 | 2.386 | 0.122 | 1.088 | (0.998 -1.019) | 1.218 | 8.513 | 2.048 | 0.152 | 1.950 | (0.011 -3.437) |
| EX-HN5 | 0.007 | 0.005 | 1.878 | 0.171 | 1.007 | (0.997 -1.017) | -0.502 | 1.185 | 0.179 | 0.672 | 0.605 | (0.059 -6.178) |
| EX-HN0 | 0.005 | 0.007 | 0.541 | 0.462 | 1.005 | (0.992 -1.018) | 0.785 | 5.362 | 0.021 | 0.884 | 2.192 | (0.001 -8.027) |
| GB20 | 0.004 | 0.006 | 0.486 | 0.486 | 1.004 | (0.992 -1.017) | 2.691 | 8.466 | 0.101 | 0.751 | 1.474 | (0.001 -2.368) |
| HT7 | 0.007 | 0.006 | 1.290 | 0.256 | 1.007 | (0.995 -1.020) | 6.591 | 7.583 | 0.755 | 0.385 | 7.282 | (0.001 -2.073) |
| PC6 | 0.000 | 0.004 | 0.017 | 0.897 | 1.000 | (0.993 -1.006) | 6.789 | 7.316 | 0.861 | 0.353 | 8.878 | (0.001 -1.498) |
| SP6 | -0.002 | 0.004 | 0.445 | 0.505 | 0.998 | (0.990 -1.005) | 1.212 | 8.485 | 2.042 | 0.153 | 1.845 | (0.011 -3.082) |
| RN14 | 0.000 | 0.006 | 0.003 | 0.958 | 1.000 | (0.988 -1.012) | 3.822 | 1.235 | 0.096 | 0.757 | 4.569 | (0.001 -1.500) |
| BL15 | -0.001 | 0.006 | 0.040 | 0.841 | 0.999 | (0.988 -1.010) | 1.062 | 1.296 | 0.672 | 0.412 | 4.133 | (0.001 -4.466) |

Note: B indicates regression coefficient, SE indicates standard error, Wald indicates statistical value. REM indicates Rapid Eye Movement, *OR* indicates odds ratios, 95%CI indicates 95% confidence intervals.

| **Supplementary Table 16: Correlation between acupoint pressure pain thresholds and HRV parameters (ms2)** | | | | | | | | | | | | | | | |
| --- | --- | --- | --- | --- | --- | --- | --- | --- | --- | --- | --- | --- | --- | --- | --- |
|  | **VLF(0.000-0.040Hz)** | | **LF(0.040-0.150Hz)** | | | | | | **HF(0.150-0.400Hz)** | | | **LF/HF** | | | |
| *r* | *P* | *r* | | *P* | | *r* | | | *P* | | *r* | | | *P* |
| GV20 | -0.256 | 0.218 | -0.214 | | 0.304 | | -0.125 | | | 0.553 | | -0.476 | | | 0.016* |
| EX-HN3 | -0.378 | 0.063 | -0.187 | | 0.372 | | 0.085 | | | 0.686 | | -0.316 | | | 0.124 |
| EX-HN5 | -0.274 | 0.186 | -0.124 | | 0.556 | | -0.016 | | | 0.940 | | -0.008 | | | 0.968 |
| EX-HN0 | 0.256 | 0.216 | -0.013 | | 0.949 | | -0.033 | | | 0.875 | | 0.099 | | | 0.637 |
| GB20 | 0.037 | 0.859 | -0.196 | | 0.348 | | 0.072 | | | 0.731 | | -0.019 | | | 0.927 |
| HT7 | -0.169 | 0.420 | -0.176 | | 0.399 | | 0.116 | | | 0.581 | | -0.334 | | | 0.103 |
| PC6 | -0.268 | 0.196 | | -0.303 | | 0.141 | | 0.019 | | | 0.929 | | -0.173 | 0.408 | |
| SP6 | -0.391 | 0.053 | | -0.397 | | 0.049* | | 0.035 | | | 0.868 | | -0.227 | 0.275 | |
| RN14 | -0.259 | 0.212 | | -0.360 | | 0.077 | | -0.340 | | | 0.096 | | 0.226 | 0.277 | |
| BL15 | -0.183 | 0.382 | | -0.262 | | 0.205 | | 0.045 | | | 0.830 | | -0.118 | 0.575 | |

Note: * indicates P<0.05; the difference is statistically significant.

Abbreviation: HRV: Heart rate variability; VLF: Very Low Frequency; LF: Low Frequency; HF: High Frequency;
